RETRACTION

# Retraction: MMP-9, uPAR and Cathepsin B Silencing Downregulate Integrins in Human Glioma Xenograft Cells *In Vitro* and *In Vivo* in Nude Mice

The PLOS One Editors

After the publication of this article [1], concerns were raised about results presented in Figs 4 and 5. Specifically,

- The Fig 4A GAPDH panel of this article [1], appears to partially overlap with the Fig 5A GAPDH and the Fig 5E GAPDH panels of [2], despite being used to represent different experimental conditions.
- The Fig 5E 5310 Control panel appears to partially overlap with the Fig 5E 5310 SV-sh panel.

The authors did not respond to the journal's communications.

In light of the above concerns, which call into question the reliability and integrity of the published image data and their associated quantified results, the PLOS One Editors retract this article.

All authors either did not respond directly or could not be reached.

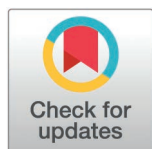

## References

1. Veeravalli KK, Chetty C, Ponnala S, Gondi CS, Lakka SS, Fassett D, et al. MMP-9, uPAR and cathepsin B silencing downregulate integrins in human glioma xenograft cells *in vitro* and *in vivo* in nude mice. PLoS One. 2010;5(7):e11583. <https://doi.org/10.1371/journal.pone.0011583> PMID: 20657647
2. Dasari VR, Veeravalli KK, Tsung AJ, Gondi CS, Gujrati M, Dinh DH, et al. Neuronal apoptosis is inhibited by cord blood stem cells after spinal cord injury. J Neurotrauma. 2009;26(11):2057–69. <https://doi.org/10.1089/neu.2008.0725> PMID: 19469692

## OPEN ACCESS

**Citation:** The PLOS One Editors (2025) Retraction: MMP-9, uPAR and Cathepsin B Silencing Downregulate Integrins in Human Glioma Xenograft Cells *In Vitro* and *In Vivo* in Nude Mice. PLoS One 20(7): e0328092. <https://doi.org/10.1371/journal.pone.0328092>

**Published:** July 11, 2025

**Copyright:** © 2025 The PLOS One Editors. This is an open access article distributed under the terms of the [Creative Commons Attribution License](https://creativecommons.org/licenses/by/4.0/), which permits unrestricted use, distribution, and reproduction in any medium, provided the original author and source are credited.
